# Supplementary material for: Targeting CD83 in mantle cell lymphoma with anti‐human CD83 antibody
Source: PubMed Central journal article supplement (PMC7362189; doi:10.1002/cti2.1156), 2020-07-15
Supplement: CTI2-9-e1156-s001.pdf [file CTI2-9-e1156-s001.pdf]

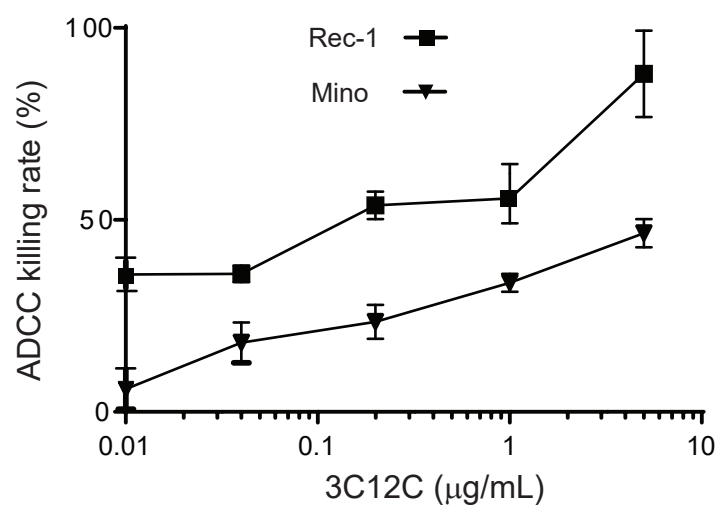

Supplementary figure 1

### MMAE killing of lymphoma cells

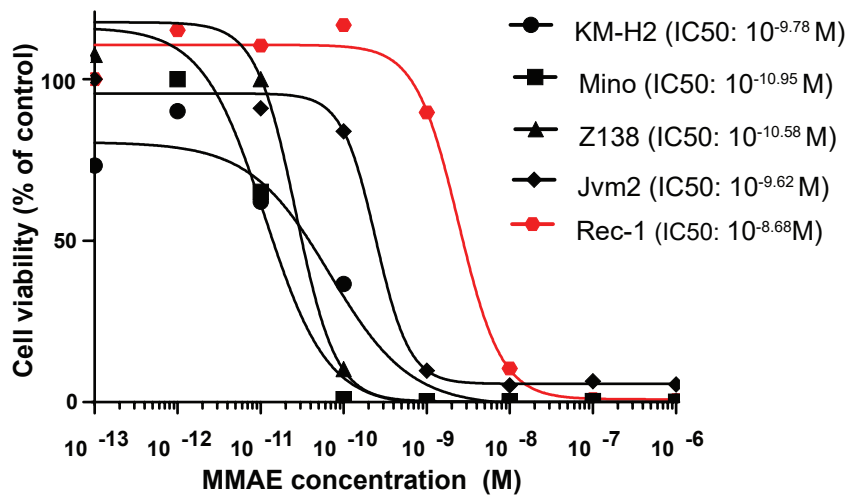

Supplementary figure 2

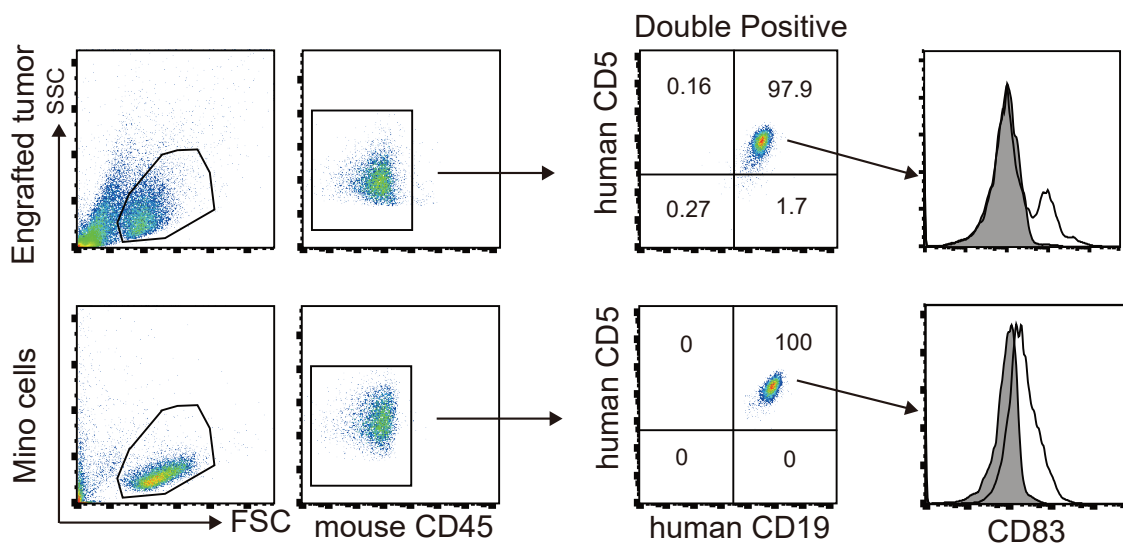

Supplementary figure 3

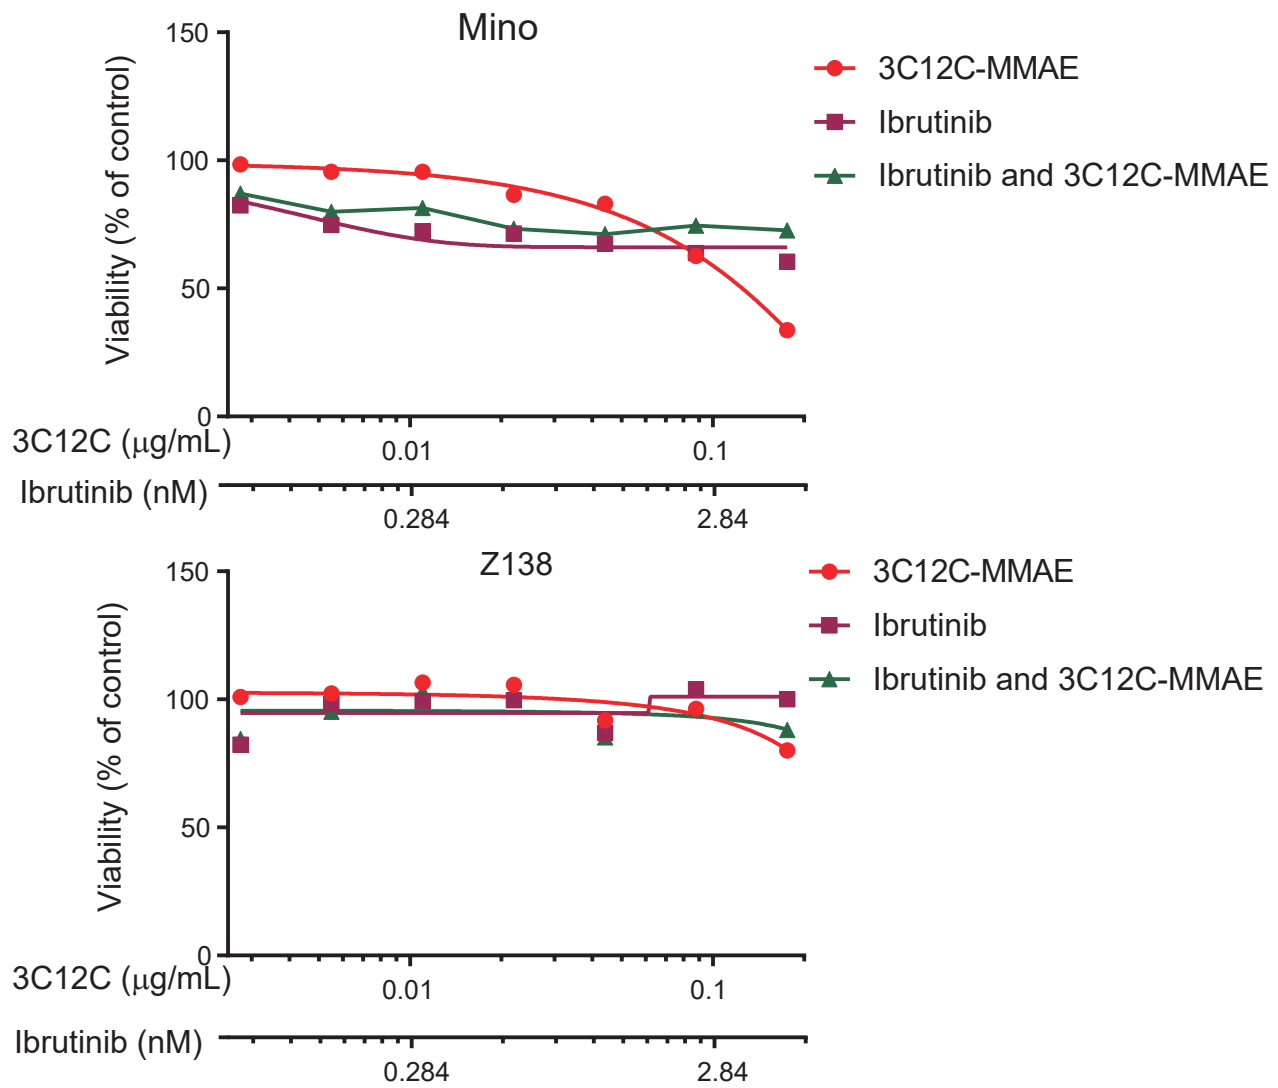

Supplementary figure 4

**a**

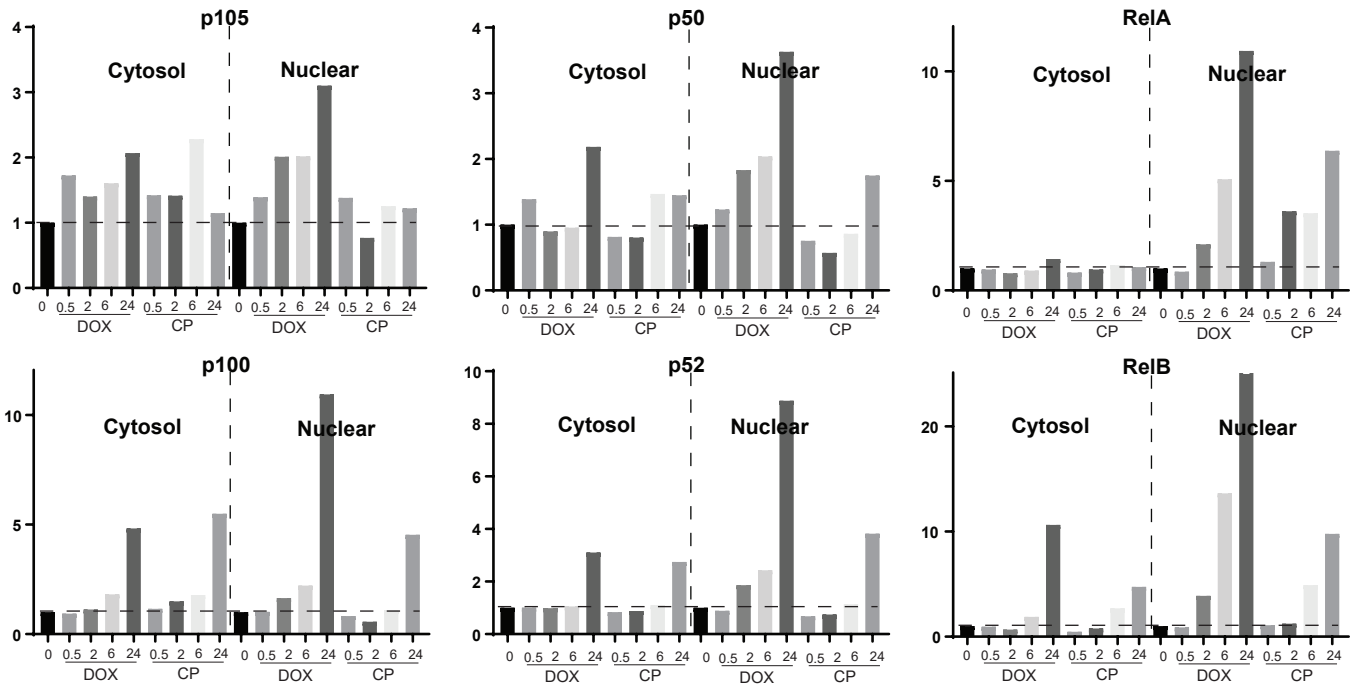

**b**

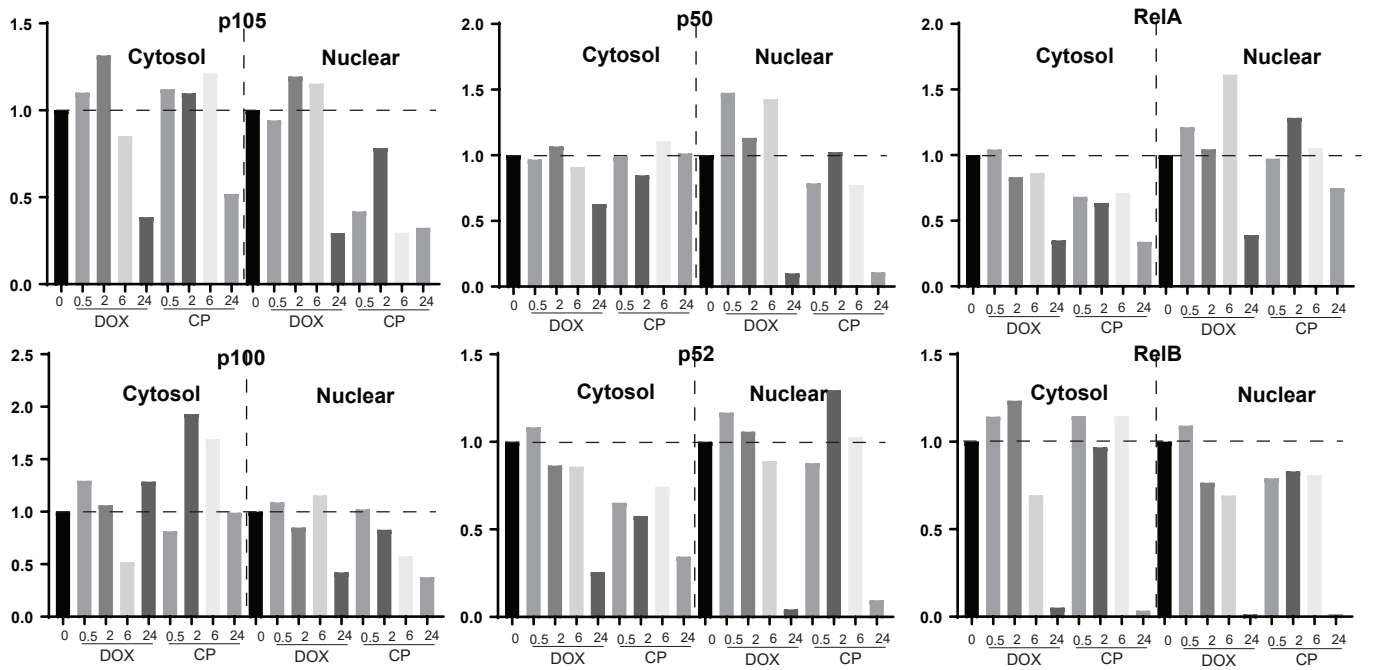

Supplementary figure 5

## **Supplementary figure legend**

**Supplementary figure 1:** Human anti-human CD83 mAb 3C12C killed CD83<sup>+</sup>MCL cell lines via ADCC.

Target cells MCL lines Mino, Rec-1 labelled with Calcein-AM were co-cultured with effector cells (human PBMC) at E:T ratio of 25:1 with increasing 3C12C concentration from 0 µg/mL to 5µg/ml at 37°C for 3 hours. Supernatant was collected for fluorescence reading (excitation 485nm, emission 538nm) of released Calcein. ADCC activity was calculated ( $n = 3$ ).

**Supplementary figure 2:** Sensitivity of MCL cell lines to the MMAE.

CD83<sup>+</sup> KM-H2, Mino, Rec-1 or CD83<sup>-</sup> Z138, Jvm2 cells were cultured with different concentrations of MMAE for 72 hours before determining viable cells by CellTiter-Glo Luminescent Cell Viability assay. Data from one representative experiment ( $n = 2$ ) with half maximal inhibitory concentration (IC50) shown.

**Supplementary figure 3:** CD83 expression on the tumour cells from MCL xenograft mice.

Tumor was dissected from MCL engrafted mice at day 6 and tumor cells were isolated for analysing the CD83 expression. Representative flow cytometry plot showing gating strategy (upper) on mouse CD45<sup>-</sup> human CD19<sup>+</sup> human CD5<sup>+</sup> cells and CD83 staining (right) of the engrafted tumor cells. Mino cells in culture was used as control (bottom).

**Supplementary figure 4:** The combination effect of Ibrutinib and 3C12C-MMAE on the killing of Mino or Z138 cells.

Mino or Z138 cells were cultured with serially diluted 3C12C-MMAE (0.176, 0.088, 0.044, 0.022, 0.011, 0.0055, 0.00275  $\mu\text{g}/\text{mL}$ ), Ibrutinib (5, 2.5, 1.25, 0.625, 0.312, 0.156, 0.078 nM) or the combination of 3C12C-MMAE/Ibrutinib (0.176/5, 0.088/2.5, 0.044/1.25, 0.022/0.625, 0.011/0.312, 0.0055/0.156, 0.00275/0.078) for 72 hours. CellTiter-Glo Luminescent cell viability assay was used to determine the killing effect. Data were from one of three independent experiments.

**Supplementary figure 5:** Relative expression level of NF- $\kappa$ B signaling molecules in Mino and Z138 cells treated with Doxorubicin or Cyclophosphamide.

Mino or Z138 cells were cultured in the presence of Doxorubicin (DOX, 0.2 $\mu\text{g}/\text{mL}$ ) or Cyclophosphamide (CP, 0.5 $\text{mg}/\text{mL}$ ) for 30 minutes, 2 hours, 6 hours and 24 hours. Cytoplasmic and nuclear protein were isolated. Immunoblot analysis of cell lysate was performed with anti-NF- $\kappa$ B antibodies. The relative protein expression level was analysed with Image Lab 4.1 software (Bio-Rad).

**Supplementary table: Chemotherapy reagents on CD83 expression of mantle cell lymphoma cell lines**

| <b>Chemotherapy reagents</b> | <b>Effect on CD83 expression</b> |
|------------------------------|----------------------------------|
| Doxorubicin                  | Yes                              |
| Cyclophosphamide             | Yes                              |
| Cytarabine                   | No                               |
| Vincristine                  | No                               |
| Temsirolimus                 | No                               |
| Lenalidomide                 | No                               |
| Bendamustine                 | No                               |
